# Supplementary material for: Milk Reduces Enamel Staining Caused by Black Tea and Chlorhexidine Mouthwash
Source: MDPI journal article supplement (doi:10.3390/beverages8030040), 2022-07-12
Supplement: s1 [file s1]

## **Supplementary information**

### **Preparation of the solutions used in the study**

Solution 1 (Turkish infusion tea)-Turkish 2 gram tea bags prepared by 5 minute infusion in 100ml distilled water. 500  $\mu$ l tea+500  $\mu$ l saliva+1000  $\mu$ l distilled water.

Solution 2 (Turkish infusion tea+milk)- Turkish 2gram tea bags prepared by 5 minute infusion in 100ml distilled water. 500  $\mu$ l tea+500  $\mu$ l saliva+500  $\mu$ l milk+500  $\mu$ l distilled water.

Solution 3 (Turkish infusion tea+milk+chlorhexidine)- Turkish 2gram tea bags prepared by 5 minute infusion in 100ml distilled water. 500  $\mu$ l tea+500  $\mu$ l saliva+500  $\mu$ l milk+500  $\mu$ l chlorhexidine.

Solution 4 (Turkish infusion tea+chlorhexidine)-Turkish 2gram tea bags prepared by 5 minute infusion in 100ml distilled water. 500  $\mu$ l tea+500  $\mu$ l saliva+500  $\mu$ l chlorhexidine+500  $\mu$ l distilled water.

Solution 5 (Steeped Turkish loose leaf tea)-Turkish 2gram loose leaf tea /100ml distilled water was let to oversteep for 30 minutes in a teapot placed

over the teakettle on dimmed stove. 500 µl tea+500 µl saliva+1000 µl distilled water.

Solution 6 (Steeped Turkish loose leaf tea+milk)- Turkish 2gram loose leaf tea /100ml distilled water was let to oversteep for 30 minutes in a teapot placed over the teakettle on dimmed stove and then milk added. 500 µl tea+500 µl saliva+500 µl milk+500 µl distilled water.

Solution 7 (Steeped Turkish loose leaf tea+milk+chlorhexidine)-Turkish 2gram loose leaf tea /100ml distilled water was let to oversteep for 30 minutes in a teapot placed over the teakettle on dimmed stove then milk and chlorhexidine added. 500 µl tea+500 µl saliva+500 µl milk+500 µl chlorhexidine.

Solution 8 (Steeped Turkish loose leaf tea+chlorhexidine)- Turkish 2gram loose leaf tea /100ml distilled water was let to oversteep for 30 minutes in a teapot placed over the teakettle on dimmed stove then chlorhexidine added. 500 µl tea+500 µl saliva+500 µl chlorhexidine+500 µl distilled water.

Solution 9 (UK infusion tea)-Imported 2gram tea bags prepared by 5 minute infusion in 100ml distilled water. 500 µl tea+500 µl saliva+1000 µl distilled water.

Solution 10 (UK infusion tea+milk)-Imported 2gram tea bags prepared by 5 minute infusion in 100ml distilled water. 500 µl tea+500 µl saliva+500 µl milk+500 µl distilled water.

Solution 11 (UK infusion tea+milk+chlorhexidine)-Imported 2gram tea bags prepared by 5 minute infusion in 100ml distilled water. 500 µl tea+500 µl saliva+500 µl milk+500 µl chlorhexidine.

Solution 12 (UK infusion tea+chlorhexidine)-Imported 2gram tea bags prepared by 5 minute infusion in 100ml distilled water. 500 µl tea+500 µl saliva+500 µl chlorhexidine+500 µl distilled water.

Solution 13 (Steeped UK loose leaf tea)-Imported 2gram loose leaf tea /100ml distilled water was let to oversteep for 30 minutes in a teapot placed over the teakettle on dimmed stove. 500 µl tea+500 µl saliva+1000 µl distilled water.

Solution 14 (Steeped UK loose leaf tea+milk)-Imported 2gram loose leaf tea /100ml distilled water was let to oversteep for 30 minutes in a teapot placed over the teakettle on dimmed stove and then milk added. 500 µl tea+500 µl saliva+500 µl milk+500 µl distilled water.

Solution 15 (Steeped UK loose leaf tea+milk+chlorhexidine)-Imported 2gram loose leaf tea /100ml distilled water was let to oversteep for 30 minutes in a teapot placed over the teakettle on dimmed stove then milk and chlorhexidine added. 500 1 tea+500 1 saliva+500 1 milk+500 1 chlorhexidine.

Solution 16 (Steeped UK loose leaf tea+chlorhexidine)-Imported 2gram loose leaf tea /100ml distilled water was let to oversteep for 30 minutes in a teapot placed over the teakettle on dimmed stove then chlorhexidine added. 500 1 tea+500 1 saliva+500 1 chlorhexidine+500 1 distilled water.

Solution 17-Chlorhexidine (500 1 chlorhexidine+500 1 saliva+1000 1 distilled water).

Solution 18-Distilled water (2ml distilled water).

### Latin Square Experimental Design Example

| Order number | 1st experiment | 2nd experiment | 3rd experiment | 4th experiment |
|--------------|----------------|----------------|----------------|----------------|
| 1            | Solution 1     | Solution 2     | Solution 3     | Solution 4     |

|   |            |            |            |            |
|---|------------|------------|------------|------------|
| 2 | Solution 2 | Solution 3 | Solution 4 | Solution 1 |
| 3 | Solution 3 | Solution 4 | Solution 1 | Solution 2 |
| 4 | Solution 4 | Solution 1 | Solution 2 | Solution 3 |
