# Supplementary material for: Milk Reduces Enamel Staining Caused by Black Tea and Chlorhexidine Mouthwash
Source: MDPI journal article supplement (doi:10.3390/beverages8030040), 2022-07-12
Supplement: s1 [file s1]

Archive with 1 entries (1 files):
- beverages-1741278-supplementary.pdf
